# Supplementary material
Source: ML conference proceedings conference paper supplement (https://openaccess.thecvf.com/content/WACV2022/html/Wang_Disentangled_Representation_With_WACV_2022_paper.html)
Supplement: Supplementary file 1 [file Wang_Disentangled_Representation_With_WACV_2022_supplemental.pdf]

# Disentangled Representation with Dual-stage Feature Learning for Face Anti-spoofing

Yu-Chun Wang\*, Chien-Yi Wang†, Shang-Hong Lai\*†

\*National Tsing Hua University, †Microsoft AI R&D Center, Taiwan

yuchun@gapp.nthu.edu.tw chiwa@microsoft.com shlai@microsoft.com

## 1. Experiments

### 1.1. Cross-dataset testing

We evaluate the generalization and robustness of our model on cross-dataset testing. We follow the state-of-the-art works that experiment on CASIA-MFSD and Replay-Attack cross-dataset protocols. The performances are measured in HTER. The results are shown in Table 2. Our cross-dataset’s results are not remarkable as unknown attack testing results, but we obtain comparable HTER with other state-of-the-art works from Replay-Attack to CASIA-MFSD and CASIA-MFSD to Replay-Attack. Because we design our method for detecting unknown attacks, we rely on the Spoof-encoder and the Live-encoder to disentangle the difference between real and attack data. In our option, as a result of having different illumination, scene, and camera sensors simultaneously, cross datasets’ live features may not share. It may inhibit the disentangled feature learning in our framework.

We fine-tune our model with few testing images to further observe the performance of our method. It is obvious from Table 3 that when a small number of testing images is added to the training dataset, the model accuracy improved obviously.

### 1.2. Visualization and Analysis

As shown in Figure 1, we visualize the feature embeddings  $F_L$  and  $F_S$  of our Live-encoder  $E_L$  and Spoof-encoder  $E_S$  simultaneously to show that these features encode different information. We adopt the leave-one-out method on the SiW-M dataset of different unknown attack types. We randomly choose 1000 real data and 1000 unseen spoof-type data from the testing set. We utilize t-SNE to convert the feature embeddings  $F_L$  and  $F_S$  in one figure. We can observe that live features and spoof features scatter apart. It means that our Spoof-encoder  $E_S$  without learning correlated features, which already learned from the Live-encoder  $E_L$ .

## 2. Computing Cost

### 2.1. Comparison with other methods

We utilize floating-point operations(FLOPs) to measure the model complexity and compare it with other disentanglement representation learning-based methods. In the inference stage, Live-info Framework and Disentanglement Framework are both abandoned. Therefore, the speed of our approach can achieve  $8.23\pm 0.1$ (ms) on NVIDIA GeForce GTX 1080 GPU. The comparison of computing cost of our method with other SOTA disentanglement representation learning methods is summarized in Table 1.

| Method | inference FLOPs | # of parameters | inference time (GTX 1080) |
|--------|-----------------|-----------------|---------------------------|
| DST[5] | 17.1G           | 6M              | -                         |
| DRL[8] | 19.6G           | 14.4M           | $12.8 \pm 0.03$ ms        |
| Ours   | 10G             | 16M             | $8.23 \pm 0.1$ ms         |

Table 1: Comparison of computing cost between our method and other SOTA methods

## 3. Model Architecture

### 3.1. The first training stage

Our Live-info Framework consists of an encoder  $E_L$  and a decoder  $D_L$ . The details of their network structures and input sizes are illustrated in Table 4. Each Conv2d layer is followed by a batch normalization layer and a Rectified Linear Unit (ReLU) activation function. We use \* as the symbol for the Conv2d layer which normalizes with the instance normalization layer instead of batch normalization layer. We use # as the symbol for the Conv2d layer without adopting Rectified Linear Unit (ReLU) activation function.

### 3.2. The second training stage

The second stage contains two parts, the Disentanglement Framework and Spoof cue module. Our Disentanglement Framework consists of two encoders,  $E_L$  and  $E_S$ , a

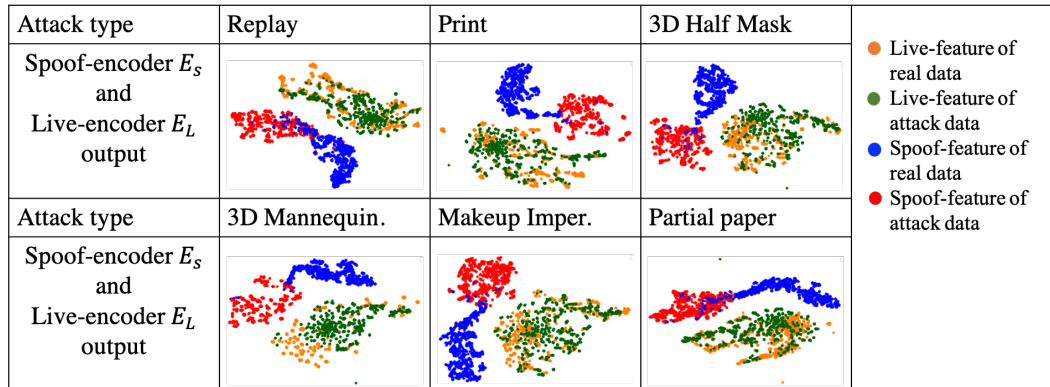

Figure 1: **Visualization of feature distributions of the SiW-M dataset by t-SNE[6].** we visualize the feature embeddings  $F_L$  and  $F_S$  of our Live-encoder  $E_L$  and Spoof-encoder  $E_S$  simultaneously.

| Method       | Train        | Test          | Train        | Test          |
|--------------|--------------|---------------|--------------|---------------|
|              | CASIA-MFSD   | Replay-Attack | CASIA-MFSD   | Replay-Attack |
| FaceDe-S[2]  | 28.5%        |               | 41.1%        |               |
| Auxiliary[4] | 27.6%        |               | <b>28.4%</b> |               |
| STASN[7]     | 31.3%        |               | 30.9%        |               |
| BASN[3]      | 23.6%        |               | 29.9%        |               |
| DRL[8]       | <b>22.4%</b> |               | 30.3%        |               |
| Ours         | 22.6%        |               | 32.77%       |               |

Table 2: The cross-dataset testing results on CASIA-MFSD[9] and Replay-Attack[1] datasets.

decoder  $D_{syn}$ , and a discriminator  $D$ . The Spoof cue module consists of a decoder  $D_{map}$  and a classifier  $C_{aux}$ . The details of their network structures and input sizes are illustrated in Table 5. Each Conv2d layer is followed by a batch normalization layer and a Rectified Linear Unit (ReLU) activation function. We use  $*$  as the symbol for the Conv2d layer without adopting the batch normalization layer. We use  $\&$  as the symbol for the Conv2d layer, which employs Leaky ReLU instead of normal ReLU as the activation function. Using  $\#$  as the symbol for the Conv2d layer without adopting Rectified Linear Unit (ReLU) activation function.

## References

- [1] Ivana Chingovska, André Anjos, and Sébastien Marcel. On the effectiveness of local binary patterns in face anti-spoofing. In *2012 BIOSIG-proceedings of the international conference of biometrics special interest group (BIOSIG)*, pages 1–7. IEEE, 2012.
- [2] Amin Jourabloo, Yaojie Liu, and Xiaoming Liu. Face de-spoofing: Anti-spoofing via noise modeling. In *Proceedings of the European Conference on Computer Vision (ECCV)*, pages 290–306, 2018.
- [3] Taewook Kim, YongHyun Kim, Inhan Kim, and Daijin Kim. Basn: Enriching feature representation using bipartite auxiliary supervisions for face anti-spoofing. In *Proceedings of the IEEE/CVF International Conference on Computer Vision Workshops*, pages 0–0, 2019.
- [4] Yaojie Liu, Amin Jourabloo, and Xiaoming Liu. Learning deep models for face anti-spoofing: Binary or auxiliary supervision. In *Proceedings of the IEEE conference on computer vision and pattern recognition*, pages 389–398, 2018.
- [5] Yaojie Liu, Joel Stehouwer, and Xiaoming Liu. On disentangling spoof trace for generic face anti-spoofing. In *European Conference on Computer Vision*, pages 406–422. Springer, 2020.
- [6] Laurens Van der Maaten and Geoffrey Hinton. Visualizing data using t-sne. *Journal of machine learning research*, 9(11), 2008.
- [7] Xiao Yang, Wenhan Luo, Linchao Bao, Yuan Gao, Dihong Gong, Shibao Zheng, Zhifeng Li, and Wei Liu. Face anti-spoofing: Model matters, so does data. In *Proceedings of the IEEE/CVF Conference on Computer Vision and Pattern Recognition*, pages 3507–3516, 2019.
- [8] Ke-Yue Zhang, Taiping Yao, Jian Zhang, Ying Tai, Shouhong Ding, Jilin Li, Feiyue Huang, Haichuan Song, and Lizhuang Ma. Face anti-spoofing via disentangled representation learning. In *European Conference on Computer Vision*, pages 641–657. Springer, 2020.

| Method             | Train        |               | Test         |               |
|--------------------|--------------|---------------|--------------|---------------|
|                    | CASIA-MFSD   | Repaly-Attack | CASIA-MFSD   | Replay-Attack |
| w/o fine-tuning    | 22.6%        |               | 32.77%       |               |
| w fine-tuning (8)  | 16%          |               | 18.61%       |               |
| w fine-tuning (16) | 15.5%        |               | 12.5%        |               |
| w fine-tuning (32) | 8.75%        |               | 11.94%       |               |
| w fine-tuning (64) | <b>5.74%</b> |               | <b>10.0%</b> |               |

Table 3: The cross-dataset testing results with a small amount of data used for model fine-tuning on CASIA-MFSD[9] and Replay-Attack[1] datasets.

- [9] Zhiwei Zhang, Junjie Yan, Sifei Liu, Zhen Lei, Dong Yi, and Stan Z Li. A face antispoofing database with diverse attacks. In *2012 5th IAPR international conference on Biometrics (ICB)*, pages 26–31. IEEE, 2012.

| Encoder                                     |                    | Decoder                                            |                    |
|---------------------------------------------|--------------------|----------------------------------------------------|--------------------|
| $E_L$ input : Image (3, 256, 256)           |                    | $D_{syn}$ input : Concatenated features (1024,8,8) |                    |
| $E_S$ input : Image (3, 256, 256)           |                    | $D_L$ input : Live feature (512, 8, 8)             |                    |
| $D_{map}$ input : Spoof feature (512, 8, 8) |                    |                                                    |                    |
| Layer                                       | chan./Stri./kernel | Layer                                              | chan./Stri./kernel |
| Conv2d                                      | 64, 2, 7           | Conv2d*                                            | 256, 1, 3          |
| MaxPool2d                                   | - , 2, 3           | Conv2d*#                                           | 256, 1, 3          |
| Conv2d                                      | 64, 1, 3           | Conv2d*#                                           | 256, 1, 1          |
| Conv2d #                                    | 64, 1, 3           | Conv2d                                             | 256, 1, 3          |
| Conv2d                                      | 64, 1, 3           | Conv2d #                                           | 256, 1, 3          |
| Conv2d #                                    | 64, 1, 3           | Conv2d*                                            | 128, 1, 3          |
| Conv2d                                      | 128, 2, 3          | Conv2d*#                                           | 128, 1, 3          |
| Conv2d #                                    | 128, 1, 3          | Conv2d*#                                           | 128, 1, 1          |
| Conv2d#                                     | 128, 2, 1          | Conv2d                                             | 128, 1, 3          |
| Conv2d                                      | 128, 1, 3          | Conv2d #                                           | 128, 1, 3          |
| Conv2d #                                    | 128, 1, 3          | Conv2d*                                            | 64, 1, 3           |
| Conv2d                                      | 256,2,3            | Conv2d*#                                           | 64, 1, 3           |
| Conv2d #                                    | 256, 1, 3          | Conv2d*#                                           | 64, 1, 1           |
| Conv2d #                                    | 256, 2, 1          | Conv2d                                             | 64, 1, 3           |
| Conv2d                                      | 256,1,3            | Conv2d #                                           | 64, 1, 3           |
| Conv2d #                                    | 256, 1, 3          | Conv2d*                                            | 64, 1, 3           |
| Conv2d                                      | 512, 2, 3          | Conv2d*#                                           | 64, 1, 3           |
| Conv2d #                                    | 512, 1, 3          | Conv2d*#                                           | 64, 1, 1           |
| Conv2d #                                    | 512, 2, 1          | Conv2d                                             | 64, 1, 3           |
| Conv2d                                      | 512, 1, 3          | Conv2d #                                           | 64, 1, 3           |
| Conv2d #                                    | 512, 1, 3          | Conv2d*                                            | 3, 1, 3            |
|                                             |                    | Conv2d*#                                           | 3, 1, 3            |
|                                             |                    | Conv2d*#                                           | 3, 1, 1            |
|                                             |                    | Conv2d                                             | 3, 1, 3            |
|                                             |                    | Conv2d#                                            | 3, 1, 3            |

Table 4: The details of the encoder and the decoder of our proposed method.

| Classifier                                       |                    | Discriminator                                               |                    |
|--------------------------------------------------|--------------------|-------------------------------------------------------------|--------------------|
| $C_{aux}$ input : Overlapped image (3, 256, 256) |                    | Discriminator input : Image or Reconstruction (3, 256, 256) |                    |
| Layer                                            | chan./Stri./kernel | Layer                                                       | chan./Stri./kernel |
| Conv2d                                           | 64, 2, 7           | Conv2d*&                                                    | 256, 2, 4          |
| MaxPool2d                                        | - , 2, 3           | Conv2d &                                                    | 512, 2, 4          |
| Conv2d &                                         | 64, 1, 3           | Conv2d &                                                    | 1024, 2, 4         |
| Conv2d #                                         | 64, 1, 3           | Conv2d &                                                    | 2048, 2, 4         |
| Conv2d                                           | 64, 1, 3           | Conv2d #*                                                   | 2048, 1, 4         |
| Conv2d #                                         | 64, 1, 3           | Linear                                                      | 1, - , -           |
| Conv2d                                           | 128, 2, 3          |                                                             |                    |
| Conv2d #                                         | 128, 1, 3          |                                                             |                    |
| Conv2d #                                         | 128, 2, 1          |                                                             |                    |
| Conv2d                                           | 128, 1, 3          |                                                             |                    |
| Conv2d #                                         | 128, 1, 3          |                                                             |                    |
| Conv2d                                           | 256, 2, 3          |                                                             |                    |
| Conv2d #                                         | 256, 1, 3          |                                                             |                    |
| Conv2d #                                         | 256, 2, 1          |                                                             |                    |
| Conv2d                                           | 256, 1, 3          |                                                             |                    |
| Conv2d #                                         | 256, 1, 3          |                                                             |                    |
| Conv2d                                           | 512, 2, 3          |                                                             |                    |
| Conv2d #                                         | 512, 1, 3          |                                                             |                    |
| Conv2d #                                         | 512, 2, 1          |                                                             |                    |
| Conv2d                                           | 512, 1, 3          |                                                             |                    |
| Conv2d #                                         | 512, 1, 3          |                                                             |                    |

Table 5: The details of the classifier and the discriminator of our proposed method.
